# Supplementary material
Source: MDPI journal article supplement (https://www.mdpi.com/2073-4344/11/10/1244)
Supplement: s1 [file s1]

# Facile surfactant-assisted synthesis of $\text{BiVO}_4$ nanoparticulate films for solar water splitting

Laura Montañés , Camilo A. Mesa , Ana Gutiérrez-Blanco , Christian Robles , Beatriz Julián-López \* and Sixto Giménez \*

Institute of Advanced Materials (INAM), Universitat Jaume I, Avenida de Vicent Sos Baynat, s/n, 12006 Castellón de la Plana, Spain; lmontane@uji.es (L.M.); cmesa@uji.es (C.A.M.); angutier@uji.es (A.G.-B.); crobles@uji.es (C.R.)

\*Correspondence: julian@uji.es (B.J.-L.); sjulia@uji.es (S.G.)

## Supplementary figures

### 1. SEM images

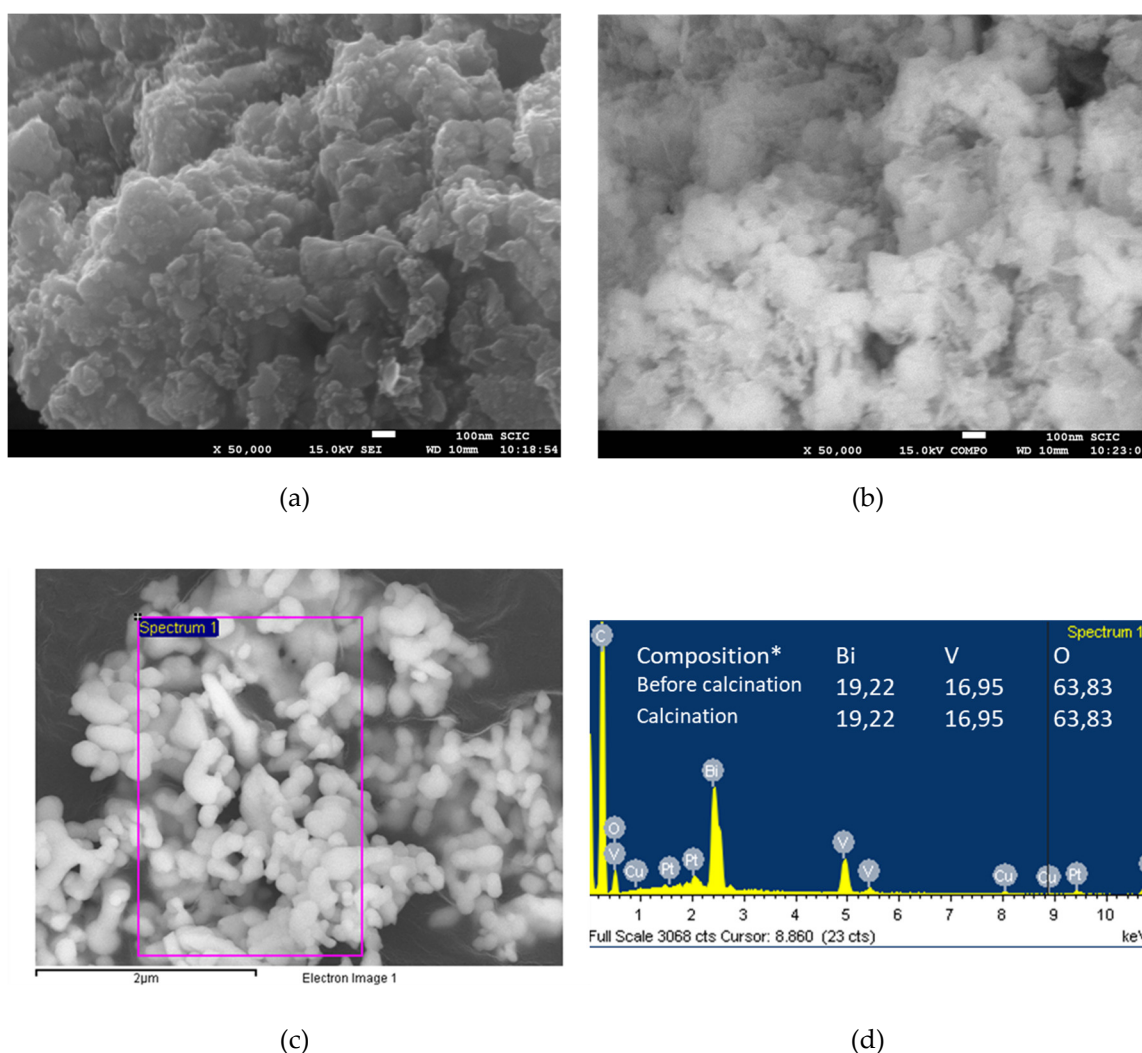

**Figure S1.** SEM images of  $\text{BiVO}_4$  sample before calcination taken with (a) secondary electron detector (SEI) and (b) backscattered electron detector (COMPO); (c) COMPO micrograph from SDBS- $\text{BiVO}_4$  sample before calcination; (d) representative EDS spectrum of SDBS- $\text{BiVO}_4$  sample.

## 2. BET analysis

**Table S1.** BET analysis results of BiVO<sub>4</sub> calcinated (obtained by surfactant-assisted synthesis).

| Relative pressure (P/P <sub>0</sub> ) | Adsorbed Vol.<br>(V <sub>A</sub> ) (cm <sup>3</sup> /g STP) | [V <sub>A</sub> (P <sub>0</sub> /P-1)] <sup>-1</sup> |
|---------------------------------------|-------------------------------------------------------------|------------------------------------------------------|
| 0.0597                                | 1.5253                                                      | 0.0416                                               |
| 0.0798                                | 1.5857                                                      | 0.0547                                               |
| 0.1197                                | 1.6953                                                      | 0.0802                                               |
| 0.1596                                | 1.8019                                                      | 0.1054                                               |
| 0.1988                                | 1.9085                                                      | 0.1300                                               |

## 3. Optical characterization

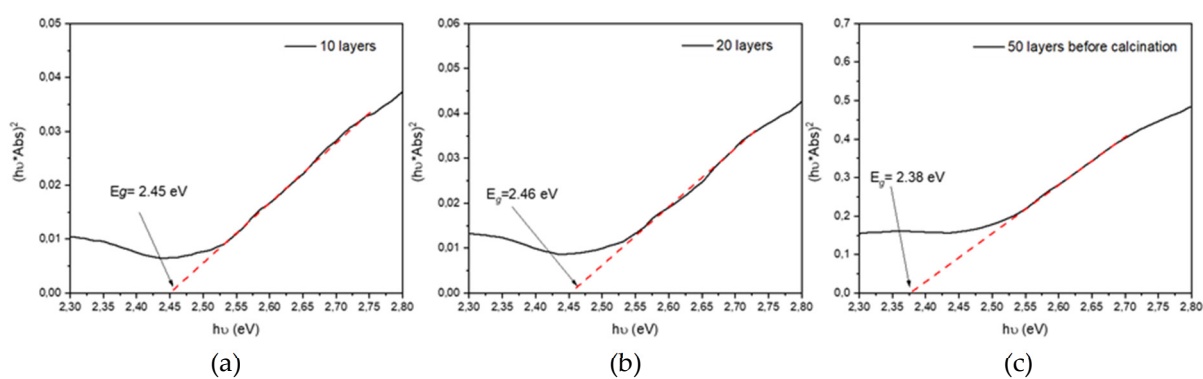

**Figure S2.** Tauc plots for bandgap determination: (a) 10 layers (b), 20 layers (c), 50 layers before calcination.

#### 4. Photoelectrochemical characterization

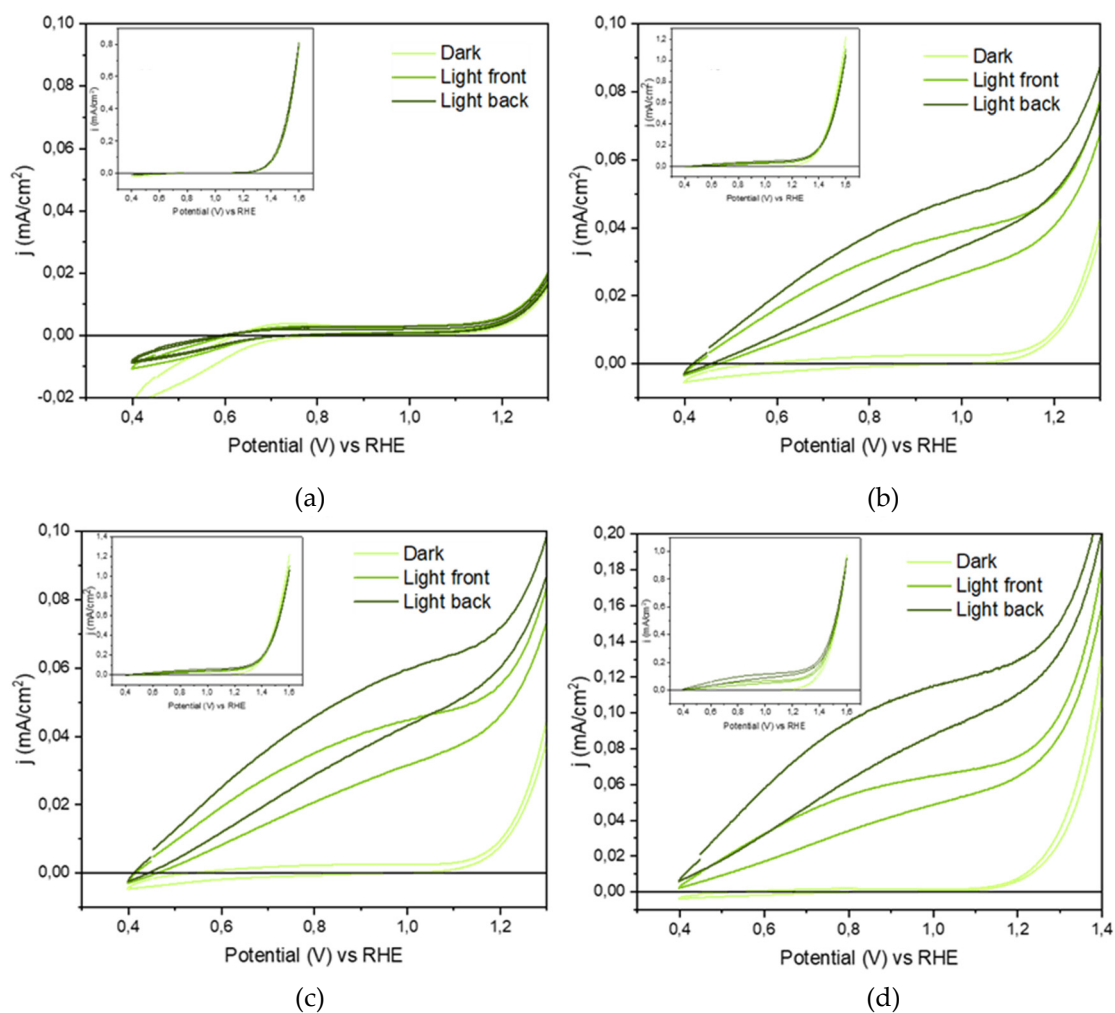

**Figure S3.** Cyclic voltammograms of  $\text{BiVO}_4$  in 0.1 M KPi buffer containing 0.1 M sodium sulfite of (a) 50 layers before calcination and (b) 10 layers, (c) 20 layers, and (d) 50 layers, after calcination.

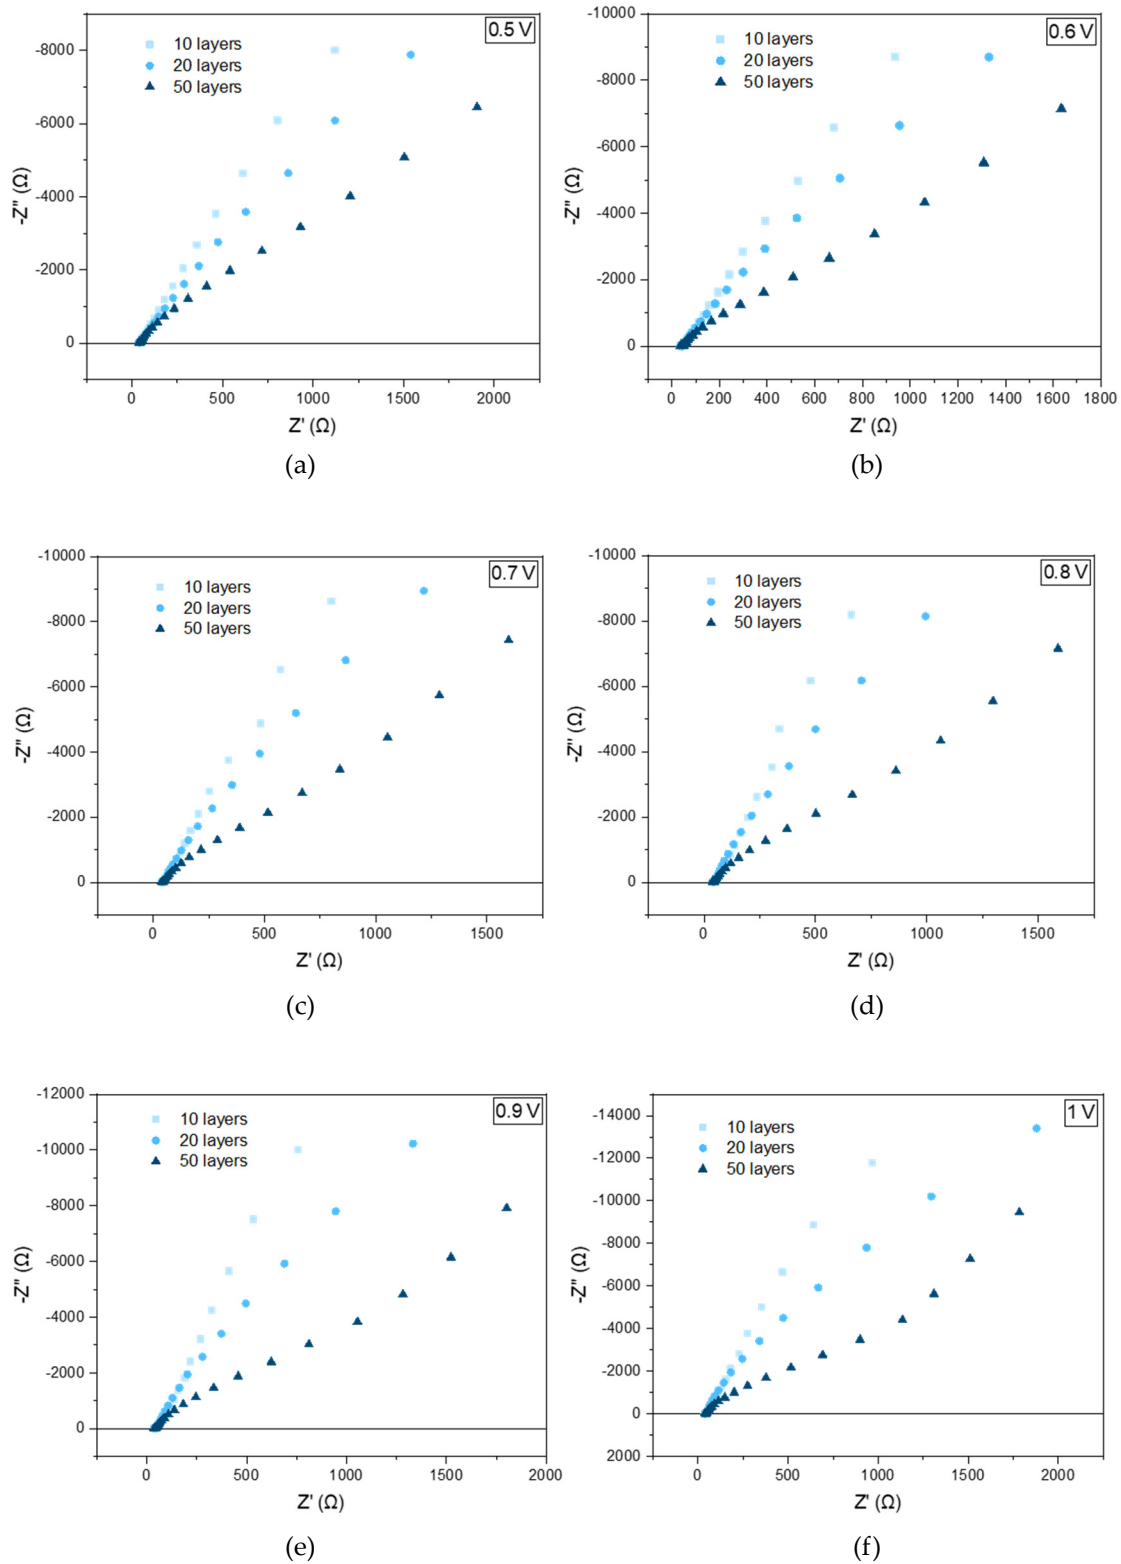

**Figure S4.** Nyquist plots of BiVO<sub>4</sub> photoanodes with different thicknesses at different applied potentials: (a) 0.5 V vs RHE, (b) 0.6 V vs RHE, (c) 0.7 V vs RHE, (d) 0.8 V vs RHE, (e) 0.9 V vs RHE, (f) 1 V vs. RHE.

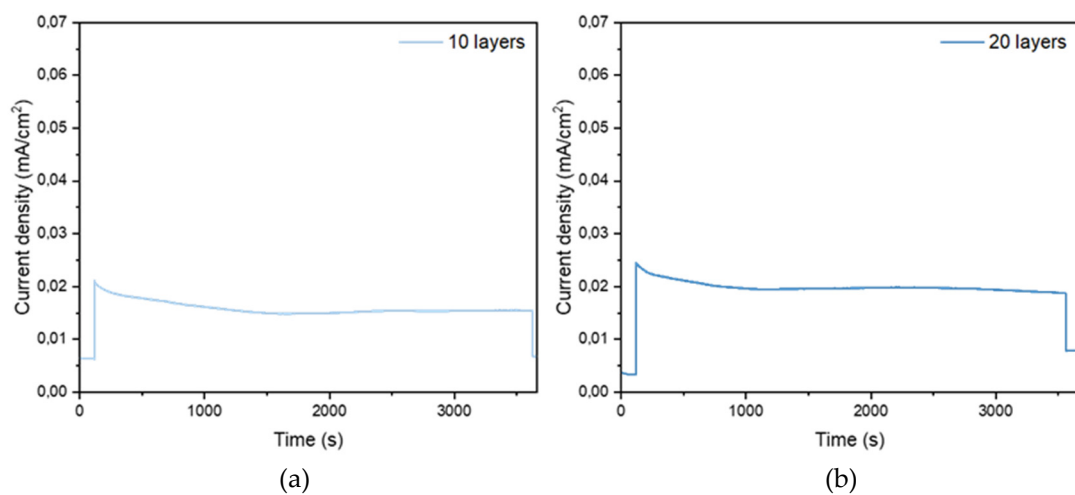

**Figure S5.** Chronoamperometries under illumination at 1.23 V vs RHE of BiVO<sub>4</sub> films formed by: (a) 10 layers and (b) 20 layers.
